# Supplementary material for: A dot-stripe Turing model of joint patterning in the tetrapod limb
Source: PubMed Central journal article supplement (PMC7174842; doi:10.1242/dev.183699), 2020-04-12
Supplement: develop-147-183699-s1.pdf [file develop-147-183699-s1.pdf]

**Table S1:** categories of gene expression pattern within the developing digit.

| Type    | Gene       | Early expression                                                                                      | Perturbation                                                                                                                                                                                                                                                                                                                                                                                                                         |
|---------|------------|-------------------------------------------------------------------------------------------------------|--------------------------------------------------------------------------------------------------------------------------------------------------------------------------------------------------------------------------------------------------------------------------------------------------------------------------------------------------------------------------------------------------------------------------------------|
| Stripes | Gdf5       | (Merino et al., 1999; Storm & Kingsley, 1999; Gao et al., 2009; Ray et al., 2015; Huang et al., 2016) | <ul style="list-style-type: none"> <li>• Gdf5 beads embedded adjacent to nascent joints inhibits joint formation in chick (Merino et al., 1999) and mouse (Storm and Kingsley, 1999)</li> <li>• Gdf5(-/-) mice show ectopic joint initiation (Storm and Kingsley, 1999)</li> </ul>                                                                                                                                                   |
|         | Wnt9a      | (Kan & Tabin, 2013; Sohaskey et al., 2008)                                                            | <ul style="list-style-type: none"> <li>• Retroviral mis-expression of Wnt9a in chick induces ectopic joint formation and downregulates chondrogenesis (Hartmann &amp; Tabin, 2001)</li> </ul>                                                                                                                                                                                                                                        |
|         | Wnt16      | (Kan & Tabin, 2013)                                                                                   | <ul style="list-style-type: none"> <li>• WNT/<math>\beta</math>-catenin signalling is necessary and sufficient to form joints (Guo et al., 2004)</li> </ul>                                                                                                                                                                                                                                                                          |
|         | PthrP      | (Gao et al., 2009)                                                                                    |                                                                                                                                                                                                                                                                                                                                                                                                                                      |
|         | Chordin    | (Kan & Tabin, 2013)                                                                                   |                                                                                                                                                                                                                                                                                                                                                                                                                                      |
|         | cJun       | (Kan & Tabin, 2013)                                                                                   | <ul style="list-style-type: none"> <li>• Cre mediated deletion of cJun from early mouse limb mesenchyme disrupts interzone formation and Wnt9a/Wnt16 interzone expression (Kan and Tabin, 2013)</li> </ul>                                                                                                                                                                                                                           |
| Dots    | pSMAD1/5/8 | (Huang et al., 2016)                                                                                  | <ul style="list-style-type: none"> <li>• Activation of the BMP pathway inhibits joint formation (Brunet et al., 1998; Zou et al., 1997)</li> <li>• Inhibition of the BMP pathway expands joint progenitors (Yi et al. 2008 )</li> <li>• In chick, interdigital sources of BMP, both endogeneously present and exogeneously applied, affect joint patterning in nearby digits (Dahn and Fallon, 2000; Suzuki et al., 2008)</li> </ul> |
|         | Ihh        | (Gao et al., 2009)                                                                                    | <ul style="list-style-type: none"> <li>• Loss of joints in Ihh(-/-) mice (Hilton et al., 2005)</li> <li>• Partial rescue of joints in Ihh(-/-); Gli3 (-/-) double mutant mice</li> <li>• Mouse Ihh E95K mutation, reducing capacity and range of hedgehog signalling, leads to loss of middle phalanx from digit V, and spreading of Gdf5 expression (Gao et al., 2009)</li> </ul>                                                   |
|         | Ppr        | (Gao et al., 2009)                                                                                    |                                                                                                                                                                                                                                                                                                                                                                                                                                      |
| Holes   | Hip1       | (Gao et al., 2009)                                                                                    |                                                                                                                                                                                                                                                                                                                                                                                                                                      |
|         | Gli1       | (Gao et al., 2009)                                                                                    |                                                                                                                                                                                                                                                                                                                                                                                                                                      |

**Table S2: Summary of model variables and parameters**

| Category      | Type         | Description                                                            |
|---------------|--------------|------------------------------------------------------------------------|
| Dot system    | $A$          | Concentration of dot molecule                                          |
|               | $S$          | Concentration of hole molecule                                         |
|               | $D_A$        | Diffusivity of $A$                                                     |
|               | $D_S$        | Diffusivity of $S$                                                     |
|               | $k_A$        | Controls degradation and production of $A$                             |
|               | $k_S$        | Controls degradation and production of $S$                             |
|               | $h_A$        | Concentration-independent production of $A$                            |
|               | $h_S$        | Concentration-independent production of $S$                            |
|               | $k_{deg}$    | Degradation rate of $A$ outside domain                                 |
| Stripe system | $B$          | Concentration of activating stripe molecule                            |
|               | $I$          | Concentration of inhibitory stripe molecule                            |
|               | $D_B$        | Diffusivity of $B$                                                     |
|               | $D_I$        | Diffusivity of $I$                                                     |
|               | $h_B$        | Controls production of $B$ that is independent of $I$                  |
|               | $k_B^0$      | Controls degradation and production of $B$                             |
|               | $k_I$        | Controls degradation and production of $I$                             |
|               | $\kappa_B^0$ | Controls the inhibitory effect of $A$ and $B$ on the production of $B$ |
| Geometry      | $L_0$        | Initial digit length                                                   |
|               | $L$          | Final digit length                                                     |
|               | $W$          | Digit width                                                            |
|               | $\epsilon$   | Semi-minor axis (half-width) of ellipses at digit ends                 |
|               | $T$          | Total simulation time                                                  |
|               | $T_i$        | Time to allow patterns to settle without growth                        |
|               | $L_p$        | Length of patterning region                                            |

**Table S3: Simulation parameters**

Unless otherwise stated, we kept the following parameters constant across all simulations:

$$k_A = 0.0025, k_S = 0.003, k_B^0 = 0.01875, k_I = 0.0375, h_A = 0.00025, h_S = 0.003, h_B = 0.00187, \kappa_B^0 = 0.2, k_{deg} = 1 \times 10^{-5}, \epsilon = 3, T_i = 5e3, \delta t = 20$$

| Figure      | $D_A$  | $D_S$  | $D_B$   | $D_I$  | $L_0$ | $L$ | $W$ | $T$  | other                                                                 |
|-------------|--------|--------|---------|--------|-------|-----|-----|------|-----------------------------------------------------------------------|
| 1C,D        | 0.008  | 0.16   | 0.006   | 0.12   | 128   | 128 | 128 | 12e4 | $k_B = k_B^0 S_0^2, \kappa_B = \kappa_B^0 A_0, \epsilon = 0, T_i = 0$ |
| 1F          | 0.008  | 0.16   | 0.006   | 0.12   | 128   | 128 | 20  | 6e4  | -                                                                     |
| 2B          | 0.0007 | 0.0135 | 0.0004  | 0.0076 | 5     | 36  | 6   | 12e4 | -                                                                     |
| 2C          | 0.002  | 0.039  | 0.0011  | 0.0219 | 5     | 40  | 10  | 12e4 | $L_p = \infty, 12, 2$                                                 |
| 2D          | 0.0018 | 0.036  | 0.001   | 0.0203 | 5     | 115 | 10  | 24e4 | $T_i = 2e4$                                                           |
| 3A (left)   | 0.004  | 0.08   | -       | -      | 128   | 128 | 128 | 12e4 | -                                                                     |
| 3A (middle) | 0.008  | 0.16   | -       | -      | 128   | 128 | 128 | 12e4 | -                                                                     |
| 3A(right)   | 0.016  | 0.32   | -       | -      | 128   | 128 | 128 | 12e4 | -                                                                     |
| 3B (upper)  | 0.0015 | 0.03   | 0.0008  | 0.0169 | 10    | 34  | 10  | 6e4  | $T_i = 1e3$                                                           |
| 3B (middle) | 0.001  | 0.02   | 0.0008  | 0.0169 | 10    | 34  | 10  | 6e4  | $T_i = 1e3$                                                           |
| 3B (lower)  | 0.0004 | 0.0075 | 0.0008  | 0.0169 | 10    | 34  | 10  | 6e4  | $T_i = 1e3, k_{deg} = 6 \times 10^{-5}$                               |
| 4B (left)   | 0.002  | 0.039  | 0.0015  | 0.0292 | 50    | 50  | 50  | 20e4 | $T_i = 2e4, \epsilon = 3$                                             |
| 4B (middle) | 0.002  | 0.039  | 0.0015  | 0.0292 | 10    | 50  | 50  | 20e4 | $T_i = 2e4, \epsilon = 3, k_{deg} = 1 \times 10^{-6}$                 |
| 4B (right)  | 0.002  | 0.039  | 0.0015  | 0.0292 | 10    | 50  | 50  | 20e4 | $T_i = 2e4, \epsilon = 3$                                             |
| 5A (left)   | -      | -      | 0.00112 | 0.2250 | 40    | 40  | 10  | 6e4  | $k_B = 0.0128, \kappa_B = 0.22, \epsilon = 0$                         |
| 5A (middle) | -      | -      | 0.0079  | 0.1575 | 40    | 40  | 10  | 6e4  | $k_B = 0.0128, \kappa_B = 0.22, \epsilon = 0$                         |
| 5A (right)  | -      | -      | 0.0056  | 0.1125 | 40    | 40  | 40  | 6e4  | $k_B = 0.0128, \kappa_B = 0.22, \epsilon = 0$                         |
| 5B (left)   | 0.0018 | 0.036  | -       | -      | 40    | 40  | 10  | 12e4 | $T_i = 1e3, \epsilon = 0$                                             |
| 5B (middle) | 0.0012 | 0.024  | -       | -      | 40    | 40  | 10  | 12e4 | $T_i = 1e3, \epsilon = 0$                                             |
| 5B (right)  | 0.0027 | 0.054  | -       | -      | 40    | 40  | 40  | 12e4 | $T_i = 1e3, \epsilon = 0$                                             |
| 5C (left)   | 0.0018 | 0.036  | 0.001   | 0.0203 | 40    | 40  | 10  | 12e4 | $T_i = 1e3, \epsilon = 0$                                             |
| 5C (middle) | 0.0012 | 0.024  | 0.001   | 0.0203 | 40    | 40  | 10  | 12e4 | $T_i = 1e3, \epsilon = 0$                                             |
| 5C (right)  | 0.0027 | 0.054  | 0.0015  | 0.0304 | 40    | 40  | 40  | 12e4 | $T_i = 1e3, \epsilon = 0$                                             |
| S1C         | 0.0008 | 0.16   | 0.006   | 0.12   | 128   | 128 | 20  | 6e4  | $k_{deg} = 0.1 \times 10^{-5}, 1 \times 10^{-4}$                      |
| S1D         | 0.0008 | 0.16   | 0.006   | 0.12   | 128   | 128 | 20  | 6e4  | $SA^2 \rightarrow SA^2(1 + 0.1B^2)^{-1}$ in Equation 1a,b; 4a,b       |
| S2A         | 0.002  | 0.039  | 0.0011  | 0.0219 | 5     | 50  | 10  | ->   | $T = 12e4, 3.5e4, 1e4$ from left to right                             |
| S2B         | 0.0024 | 0.048  | 0.0018  | 0.036  | 5     | 50  | 10  | 20e4 | $h_A^{DC} = 0, 0.0004, 0.0006, h_B^{DC} = 0.005$                      |

**A** dot-forming Turing system

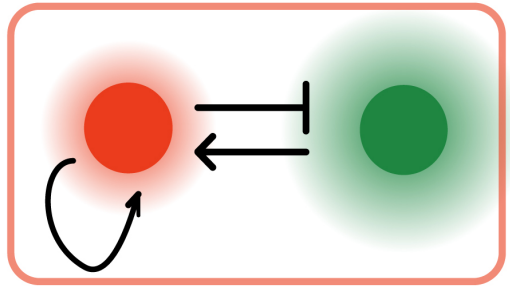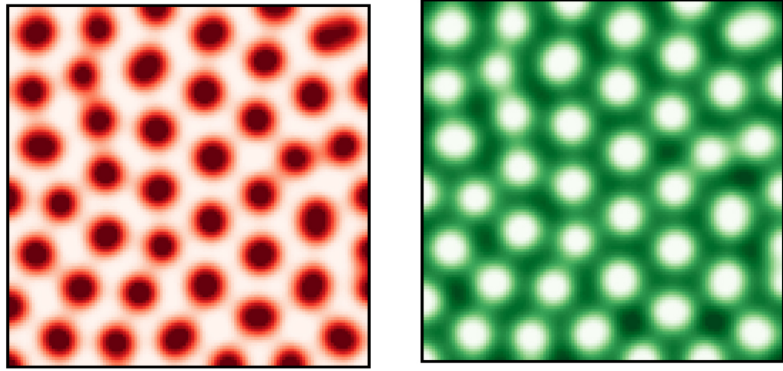

**B** stripe-forming Turing system

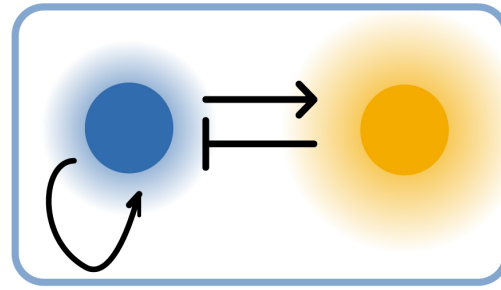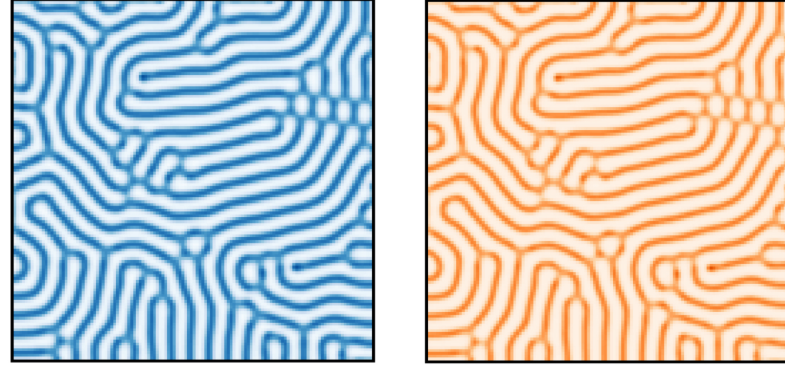

**C**

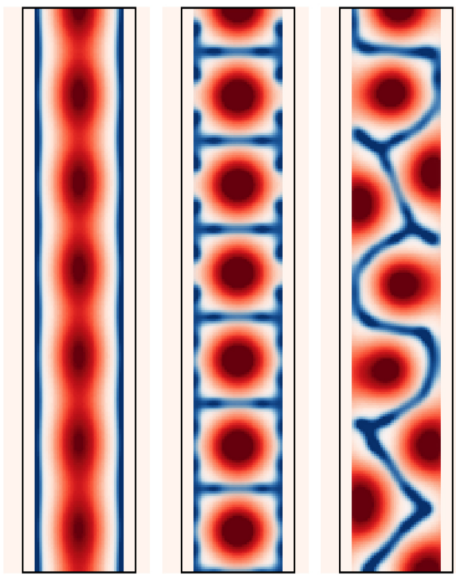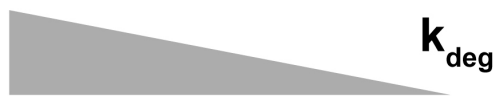

**D**

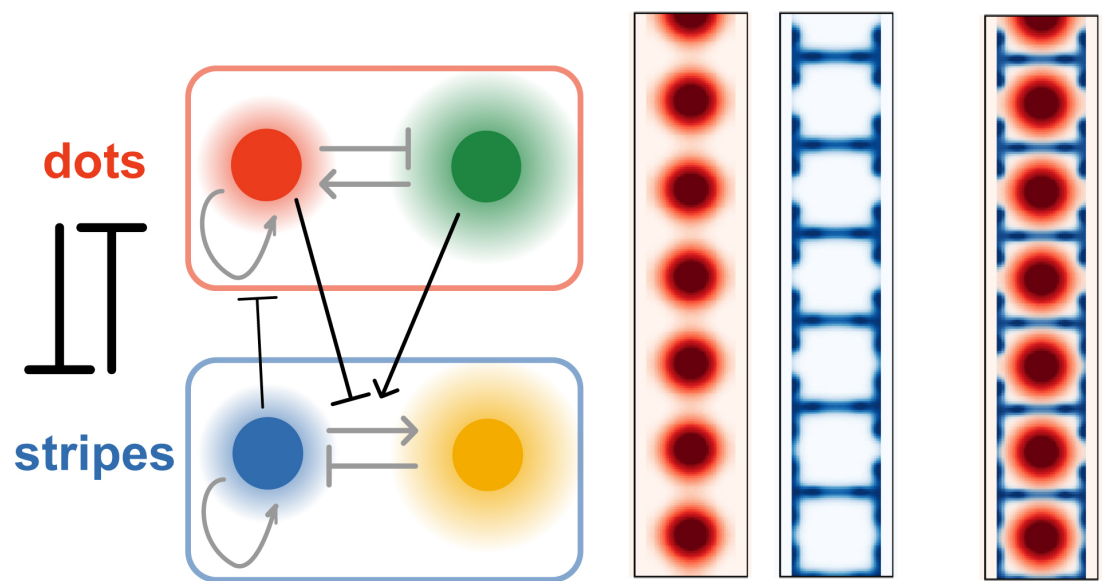

**E**

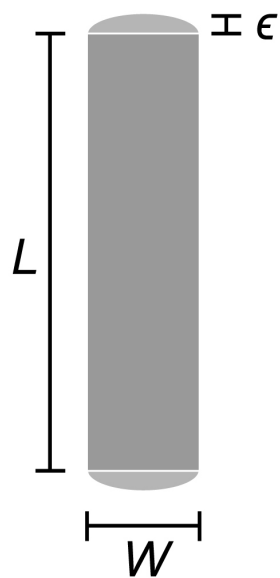

**F**

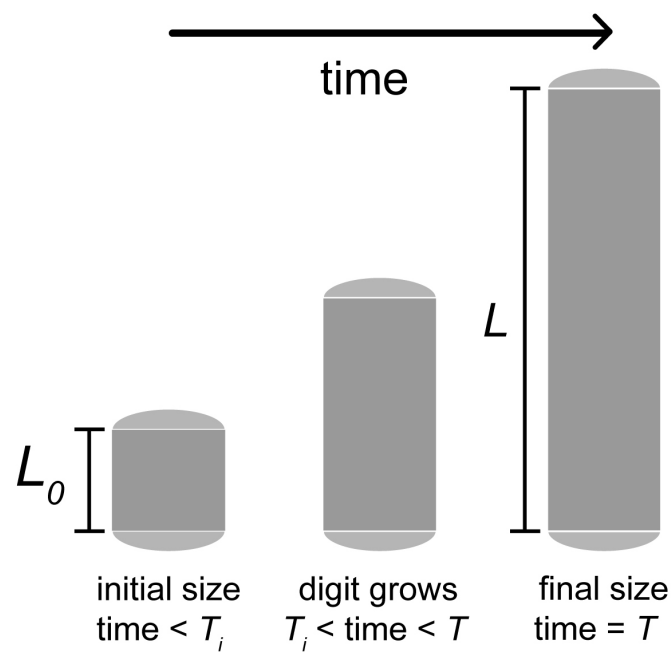

## Figure S1

- (A) In the dot-forming system, dots (red) form in antiphase with holes (green).
- (B) In the stripe-forming system, stripes (blue) form in-phase with other stripes (orange).
- (C) Varying the degradation rate of  $A$  outside the domain ( $k_{deg}$ ) changes joint orientation. An intermediate value is required to get stereotypical joint morphology.
- (D) A more general model, involving mutual repression between the dot- and stripe-systems, generates patterns that are qualitatively similar to the simpler model in Fig. 1.
- (E,F) Schematic of parameters describing digit geometry and growth.

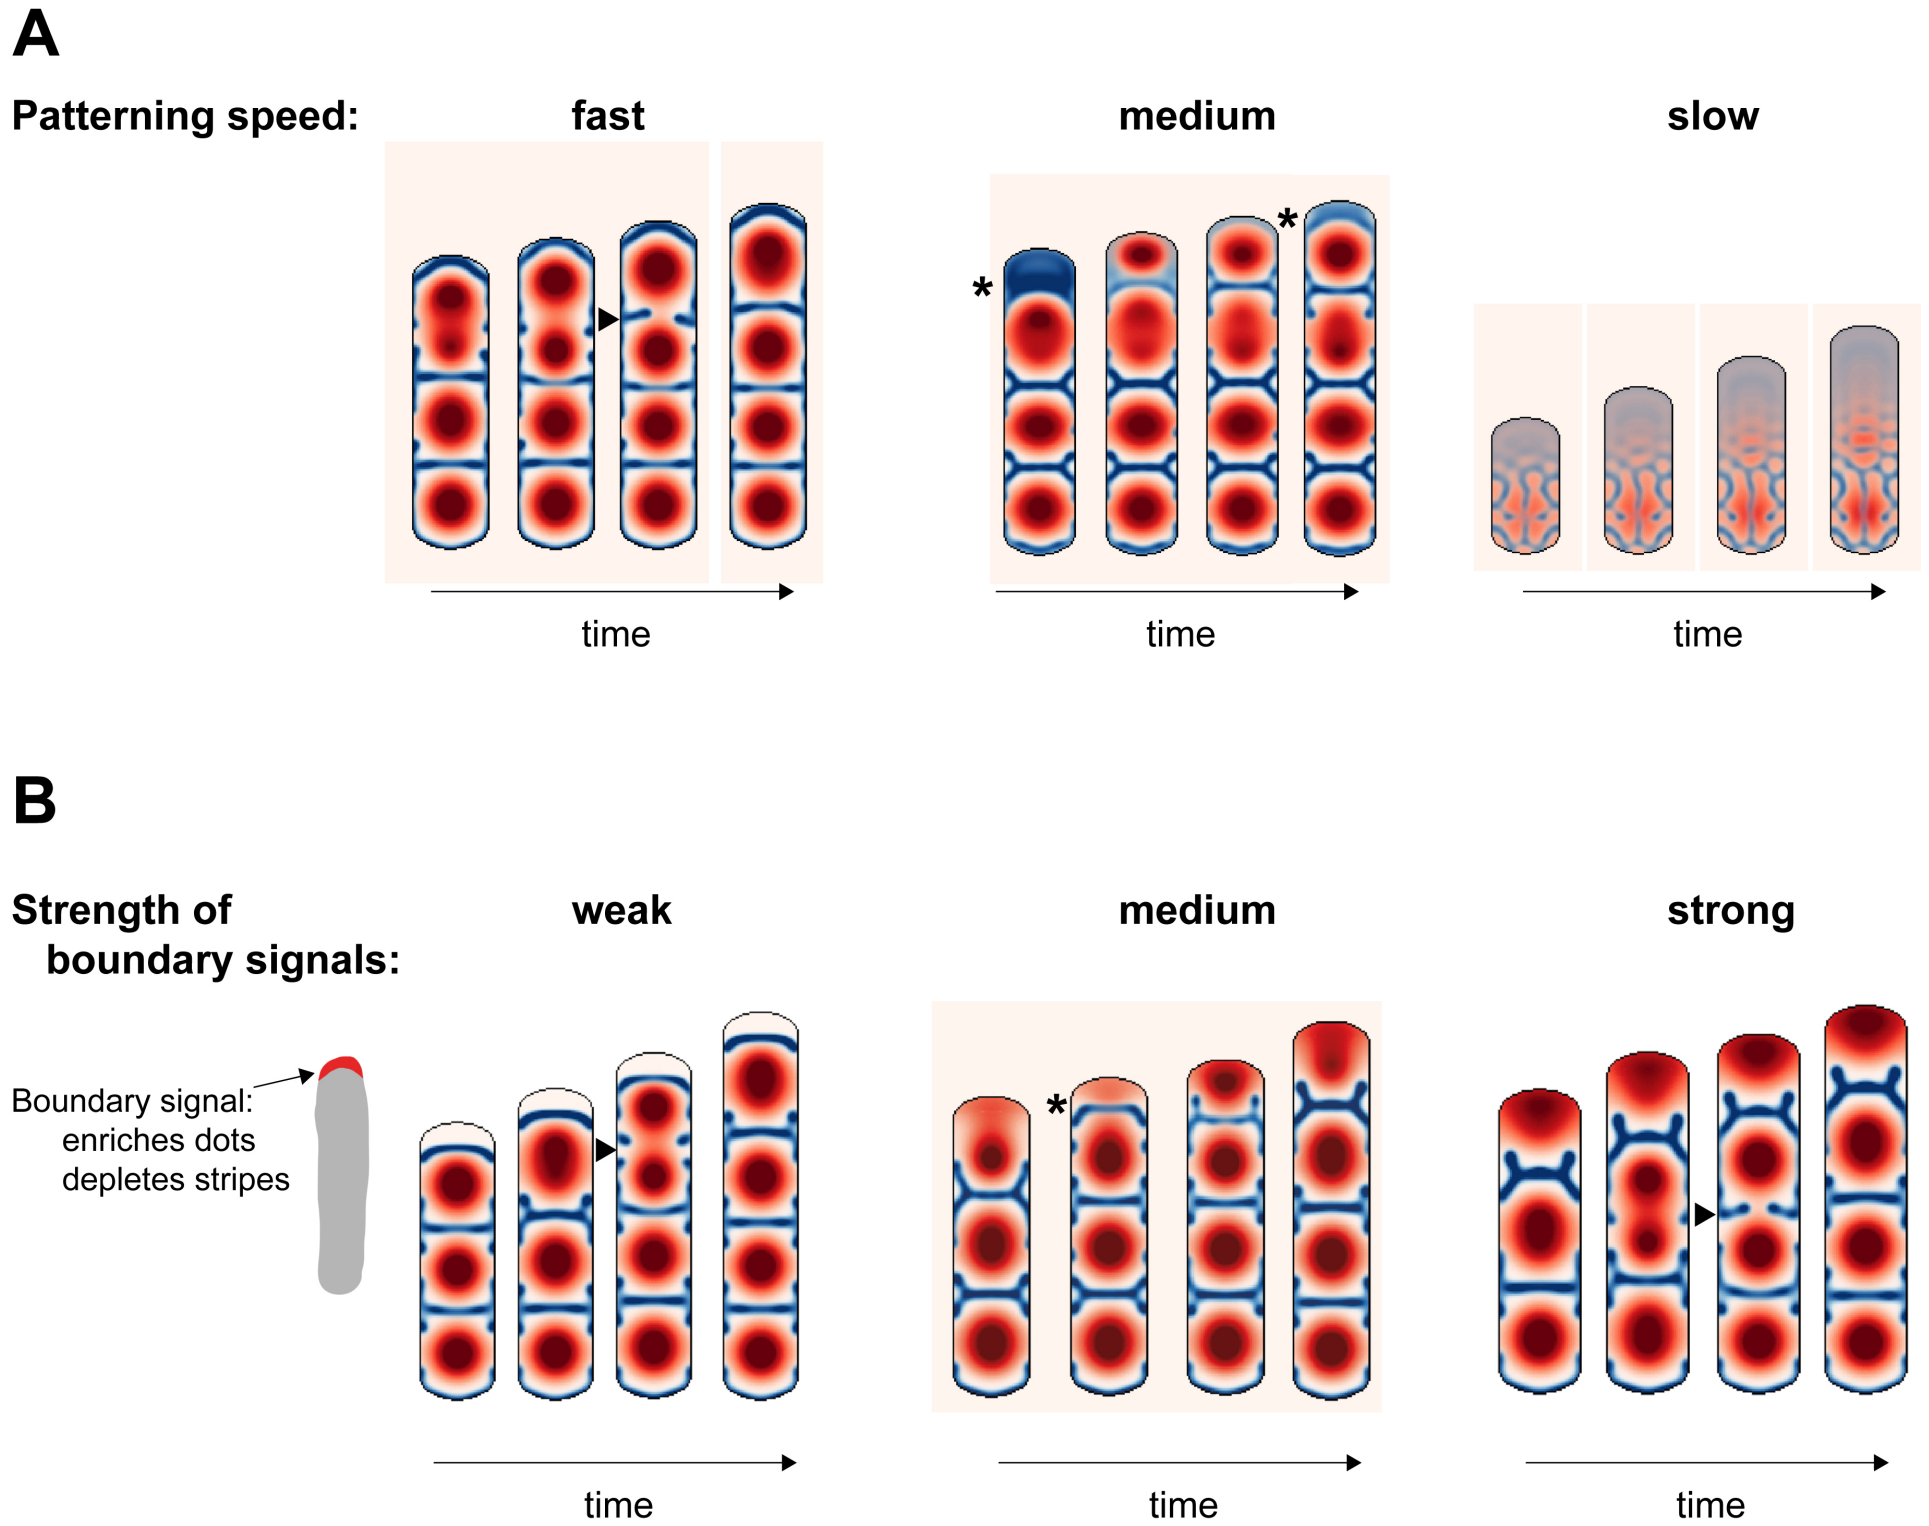

**Figure S2**

(A) Changing the speed of patterning modulates the precise location of newly forming joints. Left: fast patterning results in joints that divide the distal phalanx (arrowhead). Middle: slower patterning results in joint specification at the growing tip (asterisk). Right: if patterning is too slow, the system fails to self-organize.

(B) Modelling boundary effects can affect the precise location of newly forming joints. Left and Right: Both weak and strong boundary effects can cause joints to divide existing phalanges (arrowhead). Middle: intermediate boundary effects bias joints to form near the distal tip (asterisk).

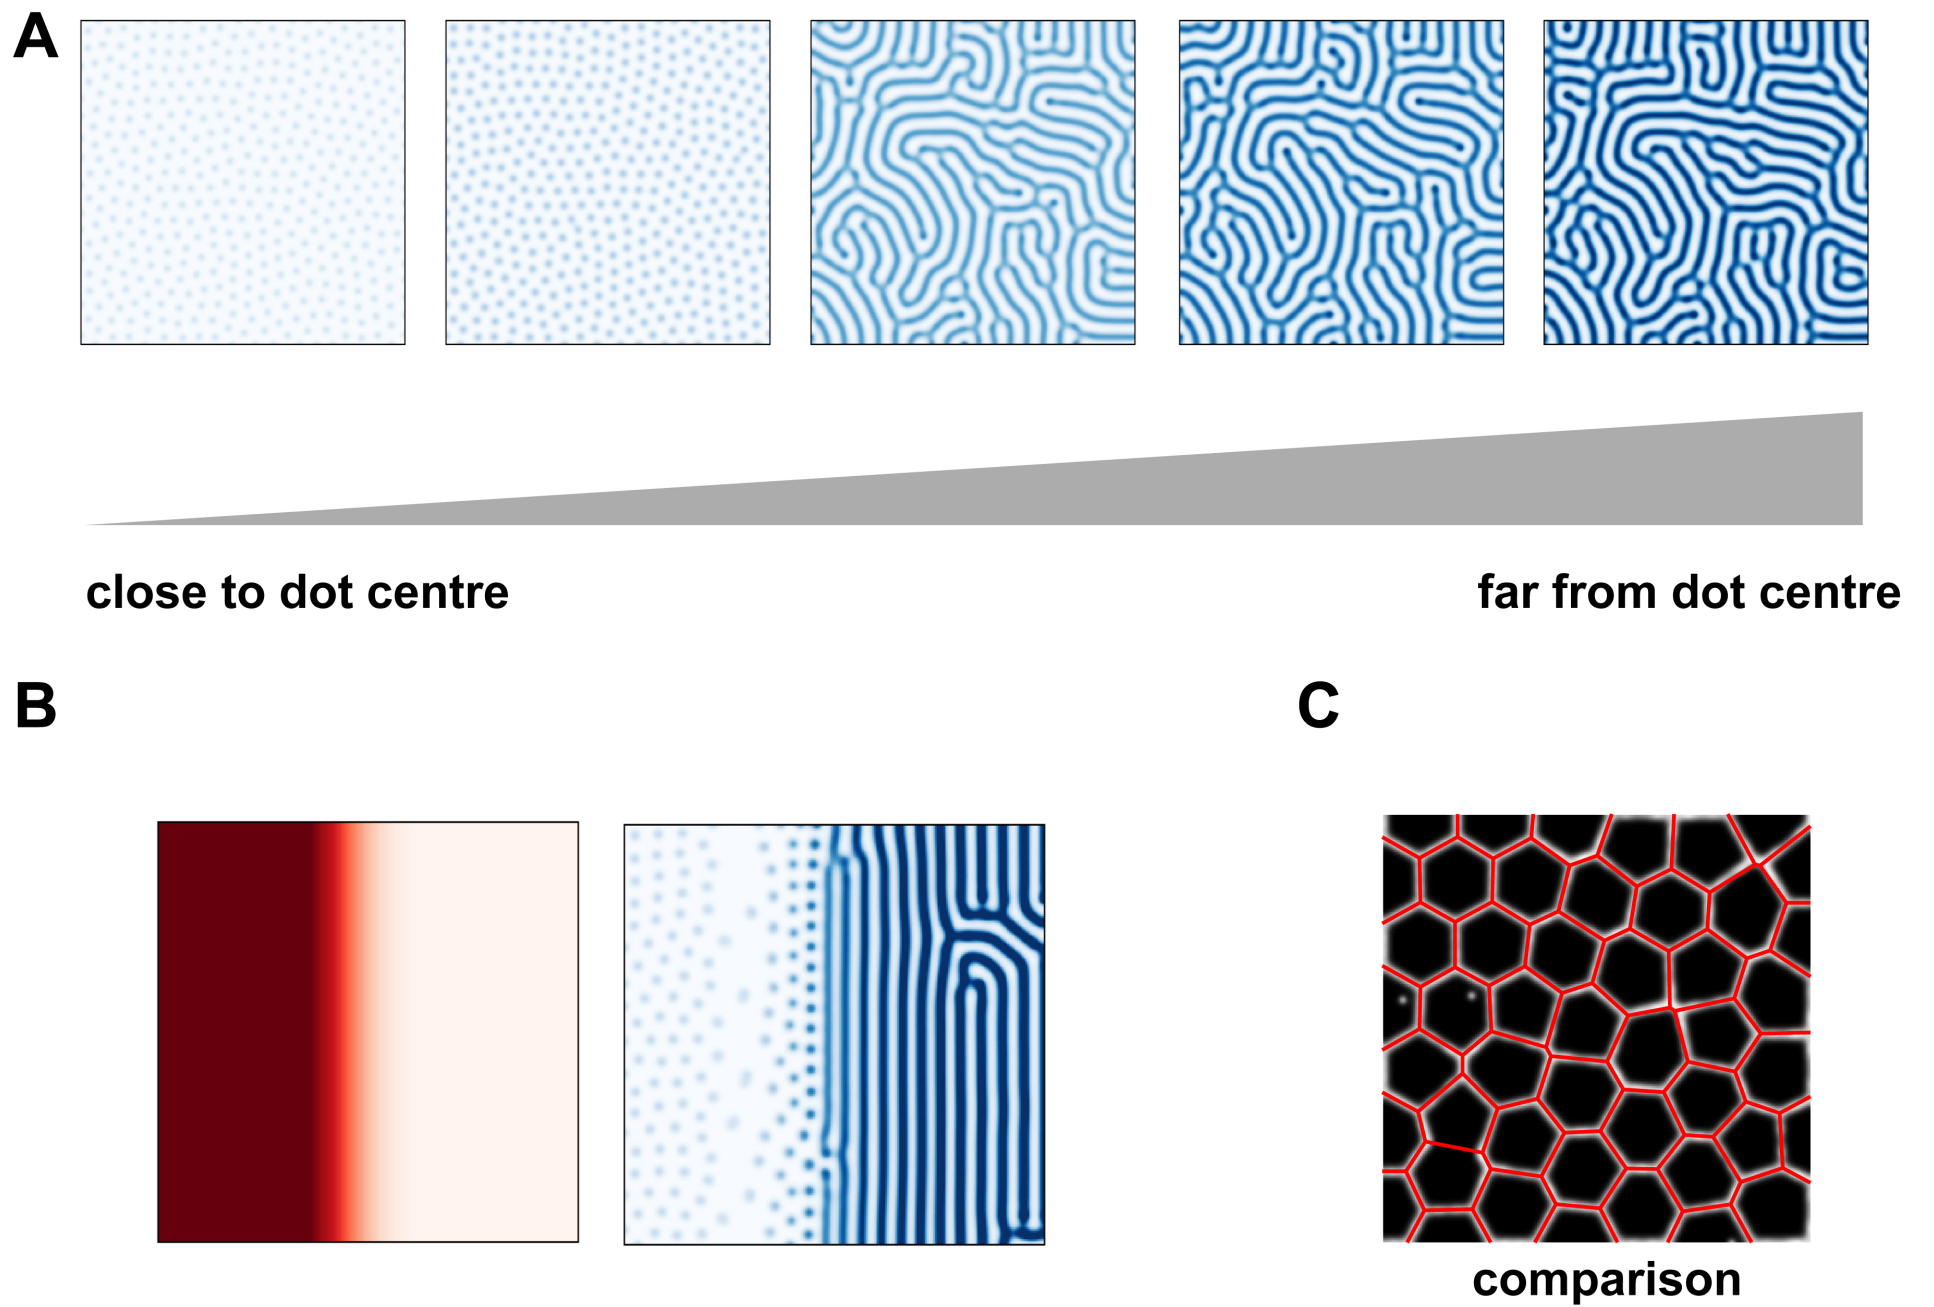

**Figure S3**

(A) Simulating the stripe system for uniform values of  $A$  and  $S$ , chosen to mimic being at different distances from a dot-centre in Fig. 4A.

(B) Simulating the stripe system for a one-dimensional gradient in the values of  $A$  and  $S$ , again chosen to mimic being at different distances from a dot-centre in Fig. 4A.

(C) Direct comparison of simulated joint patterns with the voronoi tessellation of Fig. 4A.

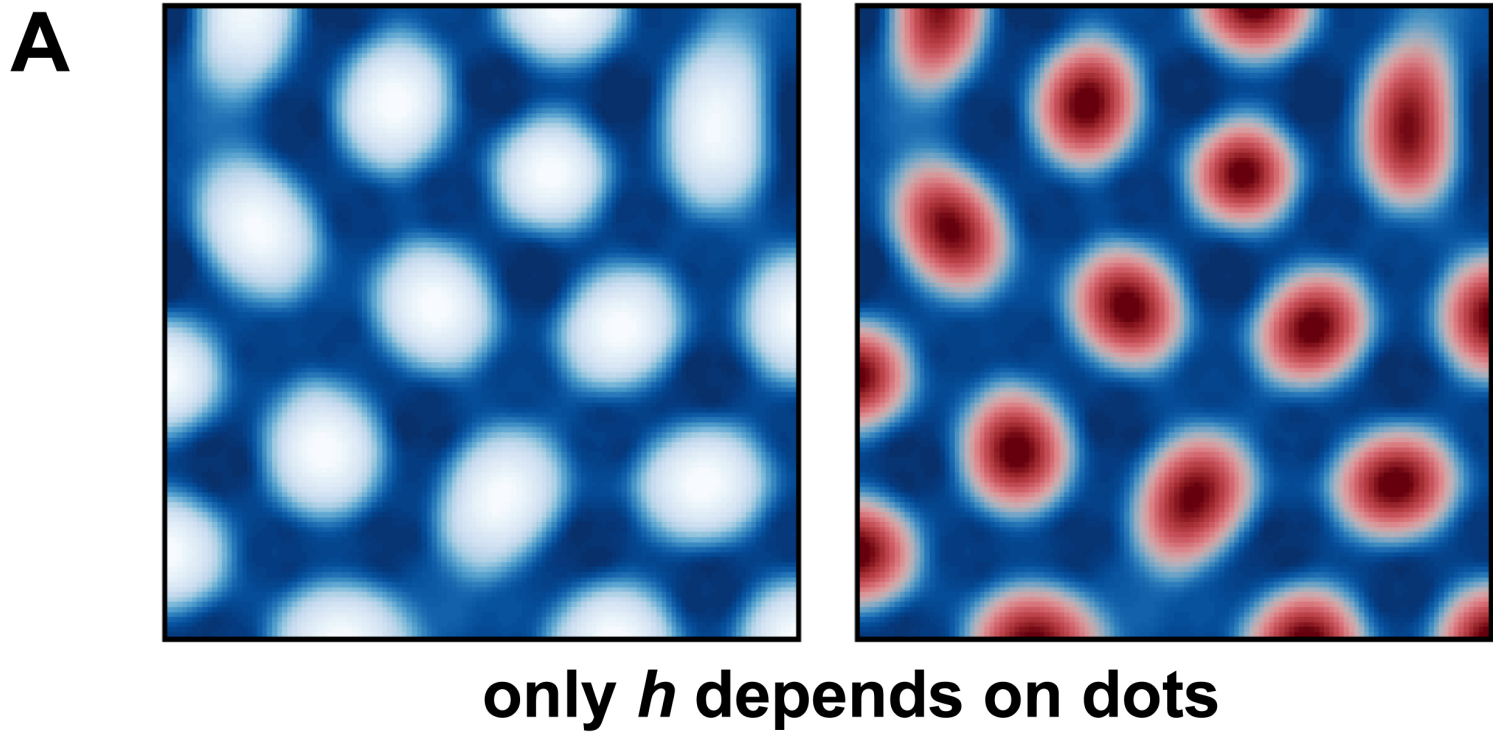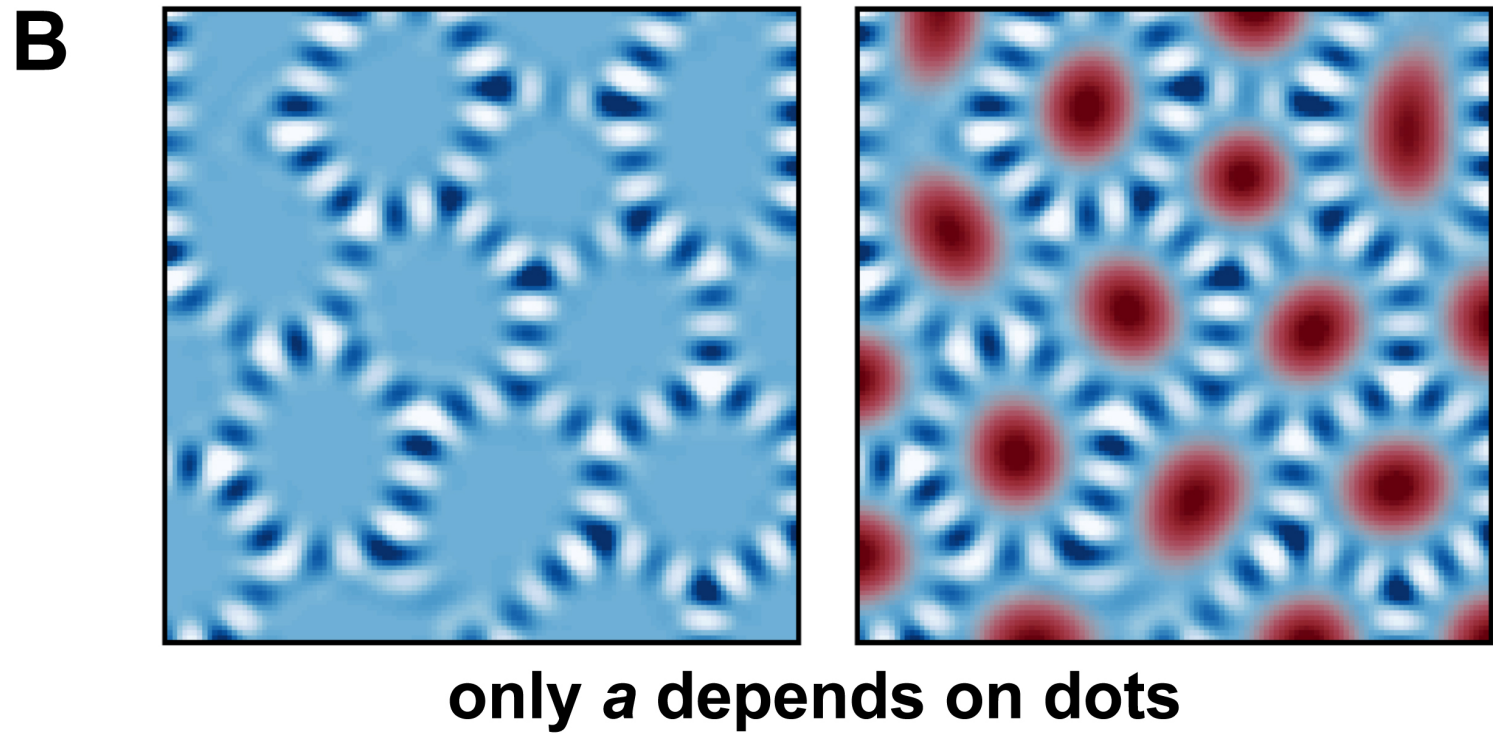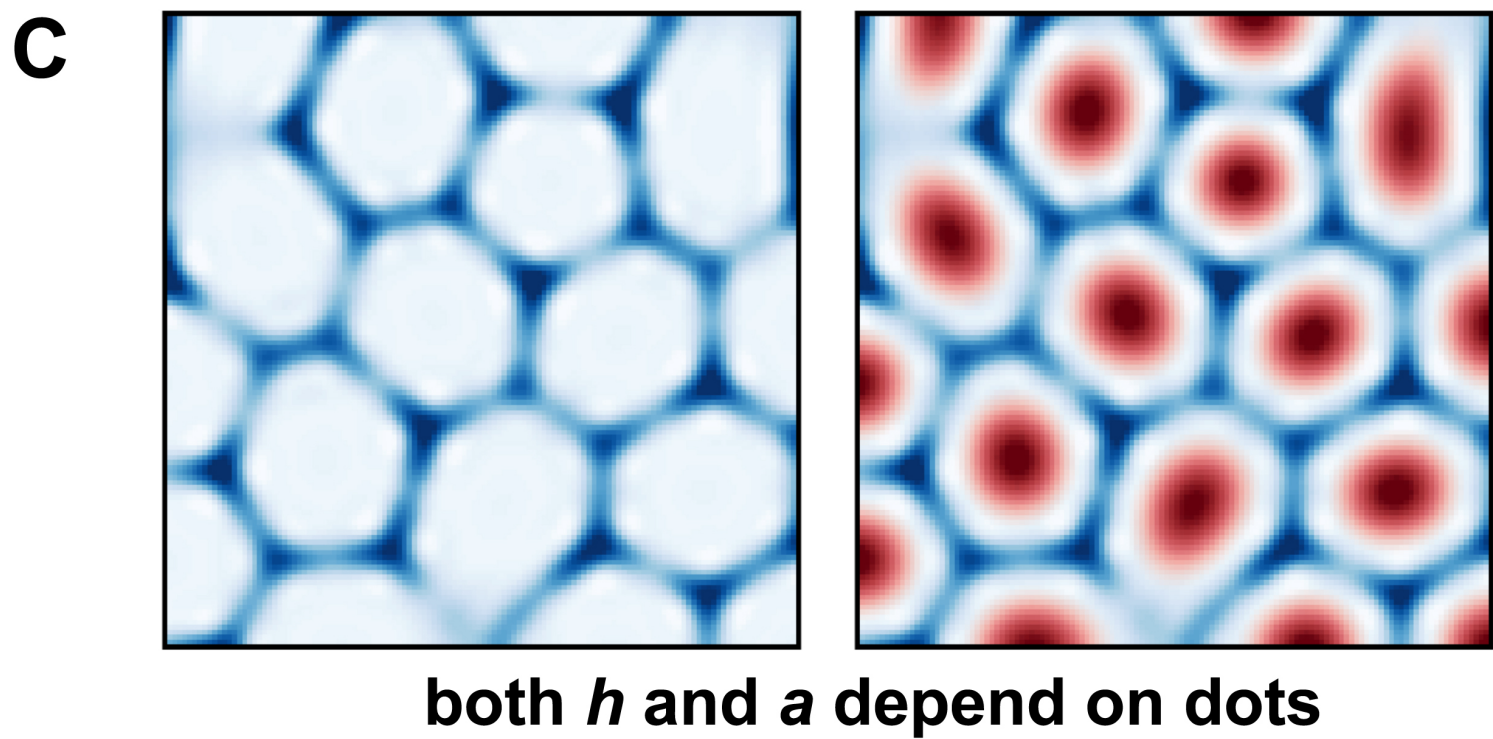



### Figure S4

- (A) Simulation of the generic dot-stripe system (Equations 7-8) with  $h$ -coupling only generates holes.
- (B) Simulation of the generic dot-stripe system (Equations 7-8) with  $a$ -coupling only generates misoriented stripes.
- (C) Simulation of the generic dot-stripe system (Equations 7-8) with both  $h$ - and  $a$ -coupling generates a polygonal lattice of joints.
